# Supplementary material for: Excessive alcohol consumption and binge drinking in college students
Source: PeerJ. 2022 May 4;10:e13368. doi: 10.7717/peerj.13368 (PMC9083527; doi:10.7717/peerj.13368)
Supplement: Supplemental Information 1 — The participants’ responses to each of the questions. [file peerj-10-13368-s001.xlsx]

## Sheet: Hoja1
ID	Age	Gender	Place of residence	Maternal level of studies	Paternal level of studies	BD	AUDIT_1	AUDIT_2	AUDIT_3	AUDIT_4	AUDIT_5	AUDIT_6	AUDIT_7	AUDIT_8	AUDIT_9	AUDIT_10	AUDIT_DOM1	AUDIT_DOM2	AUDIT_DOM3	AUDIT TOTAL
301	21	0	1	0	1	0	1	0	0	0	0	0	0	0	0	0	1	0	0	1
302	30	0	0	3	3	0	1	0	0	0	0	0	0	0	0	0	1	0	0	1
303	21	1	1	3	1	0	1	2	1	0	0	0	1	0	0	0	4	0	1	5
304	21	0	1	1	1	0	1	0	0	0	0	0	0	0	0	0	1	0	0	1
305	21	0	1	1	0	1	3	0	2	0	0	0	1	2	0	0	5	0	3	8
306	21	0	2	1	1	1	2	1	0	0	0	0	0	1	0	0	3	0	1	4
307	21	0	1	1	1	0	2	1	0	0	0	0	0	0	0	0	3	0	0	3
308	21	0	1	0	0	0	1	0	0	0	0	1	0	0	0	0	1	1	0	2
309	26	1	1	2	1	0	1	0	1	0	0	0	0	0	0	0	2	0	0	2
310	21	0	1	1	0	0	2	0	0	0	0	0	1	0	0	0	2	0	1	3
312	21	0	1	3	3	1	2	1	0	0	0	1	0	1	0	0	3	1	1	5
313	21	0	2	0	0	0	0	0	0	0	0	0	0	0	0	0	0	0	0	0
314	21	1	1	1	1	0	2	1	1	0	1	2	0	1	0	0	4	3	1	8
315	21	0	1	1	1	0	1	3	1	1	0	0	3	1	0	4	5	1	8	14
316	22	0	1	1	1	0	1	0	0	0	0	0	0	0	0	0	1	0	0	1
317	21	0	2	1	1	1	3	2	3	1	0	0	2	2	0	0	8	1	4	13
401	24	0	3	1	2	0	1	1	0	0	0	0	1	0	0	0	2	0	1	3
402	22	0	1	0	0	1	2	1	1	0	0	1	1	0	0	0	4	1	1	6
403	23	1	1	2	2	1	3	1	0	1	0	2	2	0	0	0	4	3	2	9
404	22	0	3	2	1	0	3	0	0	0	1	1	0	1	0	0	3	2	1	6
405	22	0	2	0	1	0	2	0	0	0	0	0	0	0	2	0	2	0	2	4
406	22	0	1	0	0	1	3	1	0	1	0	0	1	1	0	0	4	1	2	7
407	23	0	1	3	3	1	3	1	1	0	1	0	1	1	2	2	5	1	6	12
408	22	0	1	0	0	0	1	0	0	0	0	0	0	0	0	0	1	0	0	1
409	22	0	2	1	1	0	2	2	1	0	0	0	1	0	0	0	5	0	1	6
410	22	0	1	0	0	1	3	1	2	2	1	1	0	1	2	0	6	4	3	13
411	28	0	2	2	2	1	1	1	0	0	0	0	1	0	0	0	2	0	1	3
412	22	0	3	0	0	0	2	1	0	0	0	0	1	1	0	0	3	0	2	5
413	22	0	1	1	0	1	2	0	1	0	0	0	1	1	0	0	3	0	2	5
414	22	0	1	2	1	0	2	0	0	0	0	0	1	1	0	0	2	0	2	4
415	22	0	1	1	0	0	3	0	0	0	0	0	1	0	2	0	3	0	3	6
416	22	1	1	2	1	1	3	4	2	1	0	0	0	1	2	2	9	1	5	15
417	22	1	3	2	0	1	2	2	2	2	2	3	0	1	0	0	6	7	1	14
418	22	0	1	1	1	0	2	1	0	0	0	0	0	0	0	0	3	0	0	3
419	22	0	1	1	1	1	3	1	0	0	1	0	1	1	0	0	4	1	2	7
420	22	1	1	1	1	1	3	2	1	1	1	0	1	2	2	4	6	2	9	17
421	25	0	1	0	3	0	3	0	1	0	0	0	0	0	0	0	4	0	0	4
422	22	1	1	2	2	0	1	4	1	1	1	0	1	1	4	0	6	2	6	14
423	24	0	1	2	2	1	2	0	1	0	1	0	1	0	2	0	3	1	3	7
424	22	0	1	1	1	0	2	1	0	0	0	0	0	0	0	0	3	0	0	3
425	27	1	0	2	1	1	1	0	1	0	0	0	0	1	0	0	2	0	1	3
A1	18	0	1	1	2	1	3	1	3	1	0	0	1	1	0	4	7	1	6	14
A11	18	0	1	0	0	0	0	0	0	0	0	0	0	0	0	0	0	0	0	0
A12	20	0	1	2	3	0	0	0	0	0	0	0	0	0	0	0	0	0	0	0
A13	18	0	2	1	1	0	1	0	0	0	0	0	0	0	0	0	1	0	0	1
A14	18	0	1	1	1	0	2	0	0	0	0	0	0	0	0	0	2	0	0	2
A15	18	0	1	1	2	1	2	1	0	0	0	1	0	0	0	0	3	1	0	4
A16	18	0	1	1	1	0	0	0	0	0	0	0	0	0	0	0	0	0	0	0
A17	19	0	1	1	2	0	1	0	0	0	0	0	0	0	0	0	1	0	0	1
A2	18	0	1	1	2	1	2	3	3	1	1	3	1	1	0	4	8	5	6	19
A20	18	0	1	1	1	1	2	1	2	0	0	1	0	1	0	0	5	1	1	7
A21	18	0	2	0	0	0	2	1	1	0	0	0	0	0	0	0	4	0	0	4
A22	18	0	1	0	0	0	2	0	0	0	0	0	1	0	0	0	2	0	1	3
A23	18	0	2	2	2	1	2	2	2	0	0	1	1	2	4	0	6	1	7	14
A24	18	1	1	1	0	1	2	2	2	0	0	0	1	1	0	0	6	0	2	8
A25	18	0	1	1	2	1	1	0	1	0	0	1	0	0	0	0	2	1	0	3
A26	18	0	1	1	1	0	0	0	0	0	0	0	0	0	0	0	0	0	0	0
A29	18	1	1	0	0	1	3	2	3	1	0	0	1	1	4	4	8	1	10	19
A30	21	0	1	1	2	0	0	1	0	0	0	0	0	0	0	0	1	0	0	1
A31	18	0	1	1	1	0	1	1	0	0	0	0	0	0	0	0	2	0	0	2
A33	21	0	1	2	2	1	2	1	1	0	0	2	1	0	0	0	4	2	1	7
A34	19	0	2	2	1	0	3	0	0	0	0	0	0	0	0	0	3	0	0	3
A35	23	0	1	2	1	0	2	0	0	0	0	0	1	0	0	0	2	0	1	3
A36	18	0	1	0	1	0	2	1	1	0	0	0	0	0	0	2	4	0	2	6
A39	28	0	1	3	3	1	3	4	2	2	0	0	1	1	0	0	9	2	2	13
A40	19	0	1	0	0	1	3	0	0	0	0	0	0	0	0	0	3	0	0	3
A41	20	0	1	1	2	1	2	1	1	0	0	0	0	1	0	0	4	0	1	5
A42	18	0	1	1	2	0	1	0	0	0	0	0	0	0	0	0	1	0	0	1
A47	28	0	1	1	1	1	2	1	1	0	0	0	1	0	0	0	4	0	1	5
A48	18	0	1	2	1	0	1	0	0	0	0	0	0	1	0	0	1	0	1	2
A5	18	0	2	2	0	1	2	2	2	0	0	0	0	1	0	0	6	0	1	7
A6	18	0	1	2	1	0	1	0	0	0	0	1	0	0	0	0	1	1	0	2
A7	18	0	1	0	0	0	1	0	0	0	0	0	0	0	0	0	1	0	0	1
A8	18	0	1	1	1	0	1	0	0	0	0	0	0	0	0	0	1	0	0	1
A9	18	0	1	1	2	0	1	0	0	0	0	0	0	0	0	0	1	0	0	1
B301	20	0	1	2	1	0	2	0	0	0	0	0	0	0	0	0	2	0	0	2
B303	20	0	1	1	1	1	3	0	2	0	0	0	1	0	2	0	5	0	3	8
B304	20	0	1	0	0	1	3	0	0	0	0	0	0	0	0	0	3	0	0	3
B305	20	0	2	1	1	0	2	0	0	0	0	0	1	0	0	0	2	0	1	3
B306	30	1	1	0	0	0	1	1	1	1	1	0	0	1	2	0	3	2	3	8
B307	25	0	1	2	2	0	1	2	1	0	0	0	0	0	0	0	4	0	0	4
B308	20	0	1	1	2	0	2	2	2	0	0	0	1	0	2	0	6	0	3	9
B309	20	0	1	0	0	0	2	0	0	0	0	1	0	0	0	0	2	1	0	3
B310	20	1	1	1	1	1	2	0	1	0	0	0	0	0	0	0	3	0	0	3
B311	20	0	1	0	0	1	3	1	1	0	0	1	0	1	0	0	5	1	1	7
B312	20	0	1	1	1	1	2	1	0	0	2	0	1	1	0	0	3	2	2	7
B313	20	0	1	1	2	1	2	1	0	0	0	0	1	0	2	2	3	0	5	8
B314	20	0	2	0	0	1	2	1	1	1	0	0	1	1	0	0	4	1	2	7
B315	26	0	0	1	2	0	1	1	0	0	0	0	0	0	0	0	2	0	0	2
B317	22	0	1	1	1	0	1	0	0	0	0	0	0	0	0	0	1	0	0	1
B318	22	0	1	2	2	1	1	2	1	0	1	1	1	0	0	0	4	2	1	7
B319	20	0	2	0	1	1	2	1	0	0	0	0	0	0	0	0	3	0	0	3
B320	20	0	1	1	1	1	2	3	1	0	1	0	1	0	0	0	6	1	1	8
B321	20	1	1	0	0	0	1	2	1	0	0	0	1	1	0	0	4	0	2	6
B322	20	0	2	0	2	0	1	0	0	0	0	1	0	0	0	0	1	1	0	2
B322	22	0	1	0	0	0	1	1	1	0	0	0	0	0	0	0	3	0	0	3
B324	23	0	1	2	2	0	1	0	0	0	0	0	1	0	0	0	1	0	1	2
B325	19	0	1	2	1	1	2	1	1	0	0	0	0	0	0	0	4	0	0	4
B326	21	0	2	2	1	0	1	0	0	0	0	0	0	1	0	0	1	0	1	2
B327	22	0	1	2	1	0	1	0	0	0	0	0	0	0	0	0	1	0	0	1
B328	22	0	2	0	2	0	1	0	1	0	0	0	0	1	0	0	2	0	1	0
B330	19	1	1	1	1	0	1	1	0	0	0	0	0	0	0	0	2	0	0	2
B331	20	0	1	3	0	1	3	0	1	0	0	0	0	1	0	0	4	0	1	5
B332	19	0	1	0	0	0	1	0	0	0	0	0	0	0	0	0	1	0	0	1
B333	28	0	0	0	0	0	2	0	0	0	0	0	0	0	0	0	2	0	0	2
B334	21	0	1	1	1	0	0	0	0	0	0	0	0	0	0	0	0	0	0	0
B335	19	0	1	0	1	0	1	1	0	0	0	0	0	0	0	0	2	0	0	2
B336	19	0	2	2	2	0	2	1	2	0	0	0	2	0	0	0	5	0	2	7
B337	19	0	1	0	2	0	2	1	0	0	0	0	0	0	0	0	3	0	0	3
B338	19	0	1	0	0	0	3	1	0	0	0	0	0	1	0	0	4	0	1	5
B339	20	0	1	2	2	0	1	2	1	0	0	0	0	0	0	0	4	0	0	4
B340	20	0	1	0	1	1	2	0	0	0	0	0	1	0	0	0	2	0	1	3
B341	20	0	1	1	1	1	2	0	0	0	0	0	0	0	4	0	2	0	4	6
B342	28	0	1	2	2	0	2	0	0	0	0	0	0	0	0	0	2	0	0	2
B343	21	2	1	0	0	0	2	1	2	1	0	1	0	0	0	0	5	2	0	7
B344	20	0	1	1	0	1	2	1	1	0	0	0	1	1	2	0	4	0	4	8
B345	20	0	1	2	2	0	1	0	0	0	0	0	0	0	0	0	1	0	0	1
C1	19	0	1	2	2	0	0	0	0	0	0	0	0	0	0	0	0	0	0	0
C10	19	0	1	0	2	0	1	0	1	0	0	0	1	0	0	0	2	0	1	3
C12	19	0	1	0	0	0	0	0	0	0	0	0	0	0	0	0	0	0	0	0
C13	19	0	1	2	1	1	2	3	2	2	0	0	1	2	4	4	7	2	11	20
C14	21	0	1	0	0	0	2	1	1	1	2	2	2	2	0	0	4	5	4	13
C15	19	0	1	2	0	0	0	0	0	0	0	0	0	0	0	0	0	0	0	0
C16	19	0	1	0	1	0	2	0	0	0	0	0	0	0	0	0	2	0	0	2
C17	19	0	1	1	0	0	0	0	0	0	0	0	0	0	0	0	0	0	0	0
C18	19	0	1	0	0	0	2	0	0	0	0	0	1	1	0	0	2	0	2	4
C19	19	0	1	0	0	0	2	0	0	0	0	0	0	0	0	0	2	0	0	2
C2	19	0	1	0	0	0	2	1	0	0	0	0	1	0	2	0	3	0	3	6
C20	19	1	1	1	2	1	2	2	3	0	0	1	0	0	0	2	7	1	2	10
C21	19	0	1	0	1	0	0	0	0	0	0	0	0	0	0	0	0	0	0	0
C22	19	0	1	1	0	1	2	1	2	1	1	0	1	1	0	2	5	2	4	11
C23	19	0	1	2	0	1	2	1	2	0	1	2	0	0	0	0	5	3	0	8
C24	19	0	0	1	2	0	1	0	0	0	0	0	0	0	0	0	1	0	0	1
C25	19	0	1	0	0	0	0	0	0	0	0	0	0	0	0	0	0	0	0	0
C26	19	0	1	2	1	1	1	0	0	0	0	0	0	0	0	0	1	0	0	1
C27	19	1	2	1	1	0	0	0	0	0	0	0	0	0	0	0	0	0	0	0
C3	29	0	0	2	2	0	2	0	0	0	0	0	0	0	0	0	2	0	0	2
C4	19	0	1	1	1	1	2	0	0	0	0	0	0	0	0	0	2	0	0	2
C5	19	0	1	2	2	1	2	1	1	1	1	1	2	1	4	0	4	3	7	14
C6	19	1	1	1	0	1	2	4	3	0	1	3	2	2	0	0	9	4	4	17
C8	19	0	1	1	2	0	1	0	1	0	0	0	1	1	0	0	2	0	2	4
C9	19	0	1	1	0	0	1	0	0	0	0	0	0	0	0	0	1	0	0	1
